# Supplementary material for: Are the Hypo-Reflective Clumps Associated With Age-Related Macular Degeneration in Adaptive Optics Ophthalmoscopy Autofluorescent?
Source: PubMed Central journal article supplement — Invest Ophthalmol Vis Sci. 2024 Aug 21;65(10):28. doi: 10.1167/iovs.65.10.28 (PMC11343010; doi:10.1167/iovs.65.10.28), 2024-08-21
Supplement: iovs-65-10-28_s001.pdf [file iovs-65-10-28_s001.pdf]

## Supplementary Figures

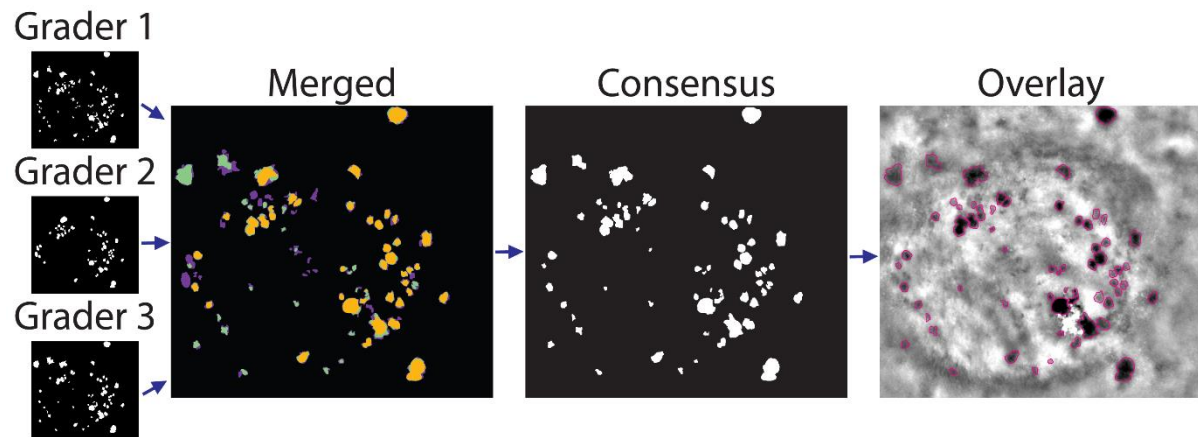

**Supplementary Figure 1:** HRCs were segmented manually on FIAO images by three graders. The structures labeled by each individual grader are shown in the left column of images. HRCs were summed to generate the Merged image that shows structures marked by only one grader as purple, those marked by two as green and those marked by all three as orange. HRCs marked by at least two graders (green and orange pixels in Merged image) were retained to generate the Consensus image mask that was used for morphometric analyses. Overlay image shows final bounds of consensus segmentation overlaid as magenta contours on the original FIAO image.

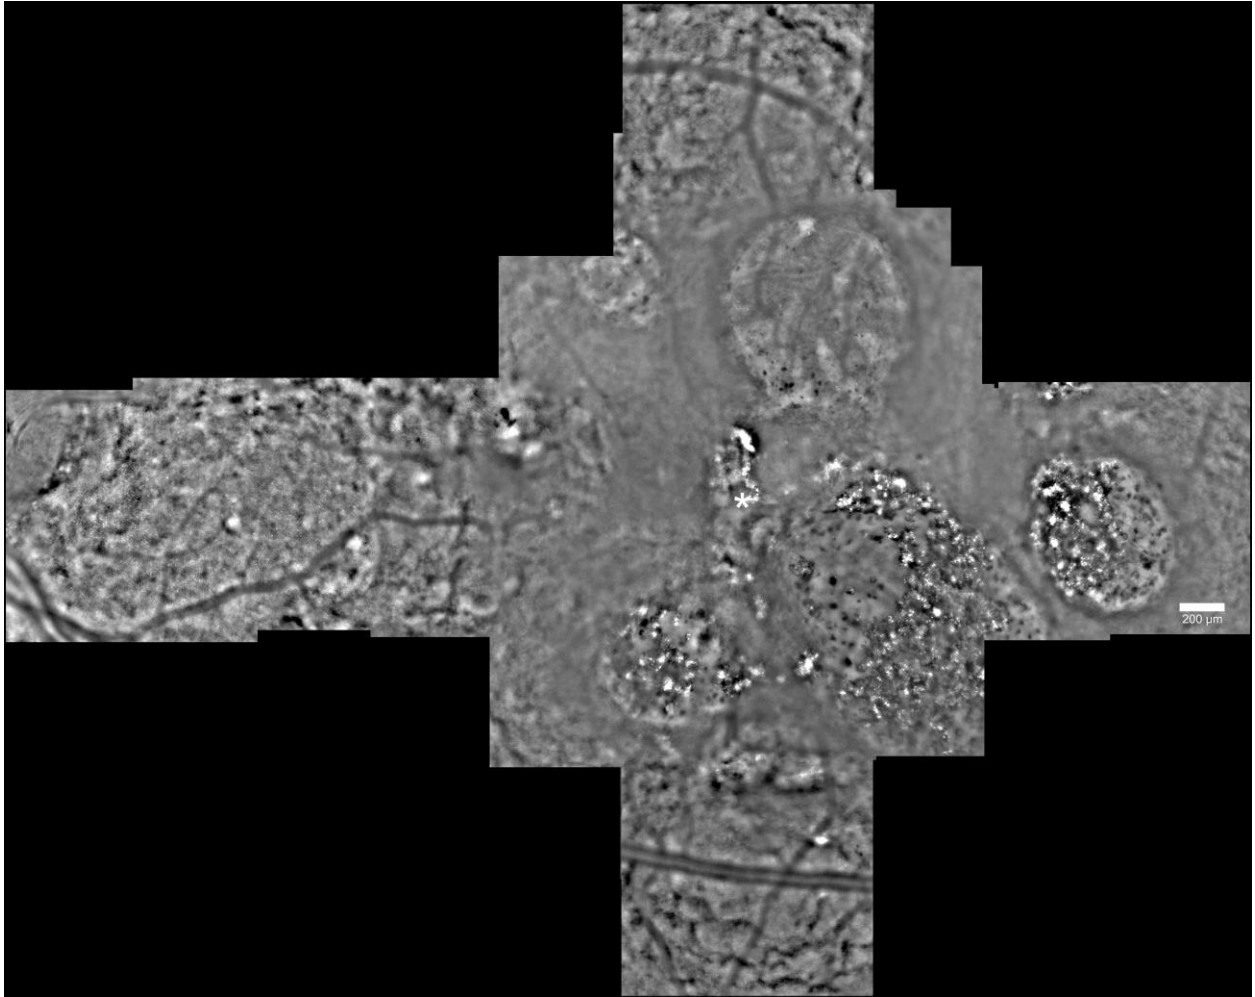

**Supplementary Figure 2:** FIAO montage from case 1.

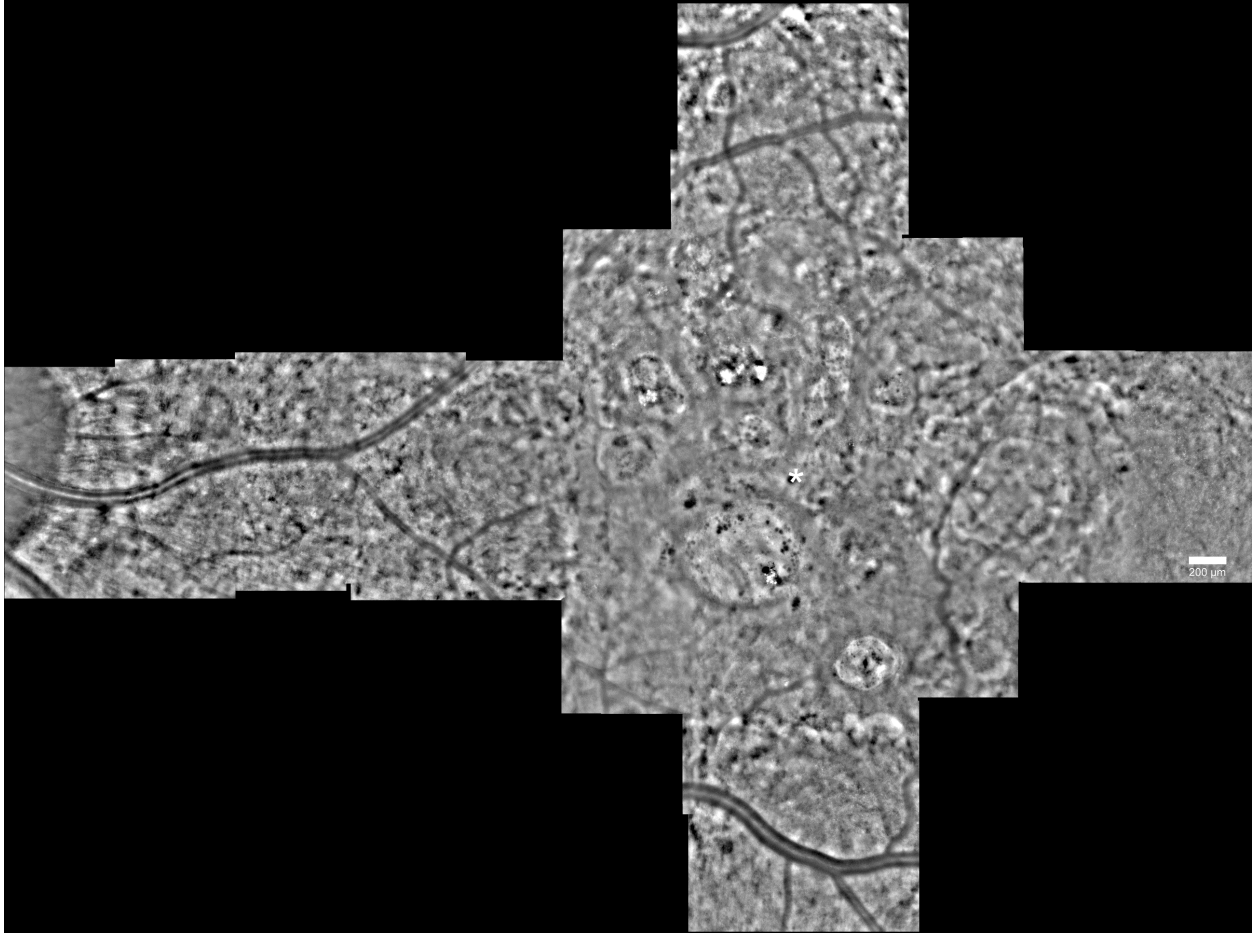

Supplementary Figure 3: FIAO montage from case 2.

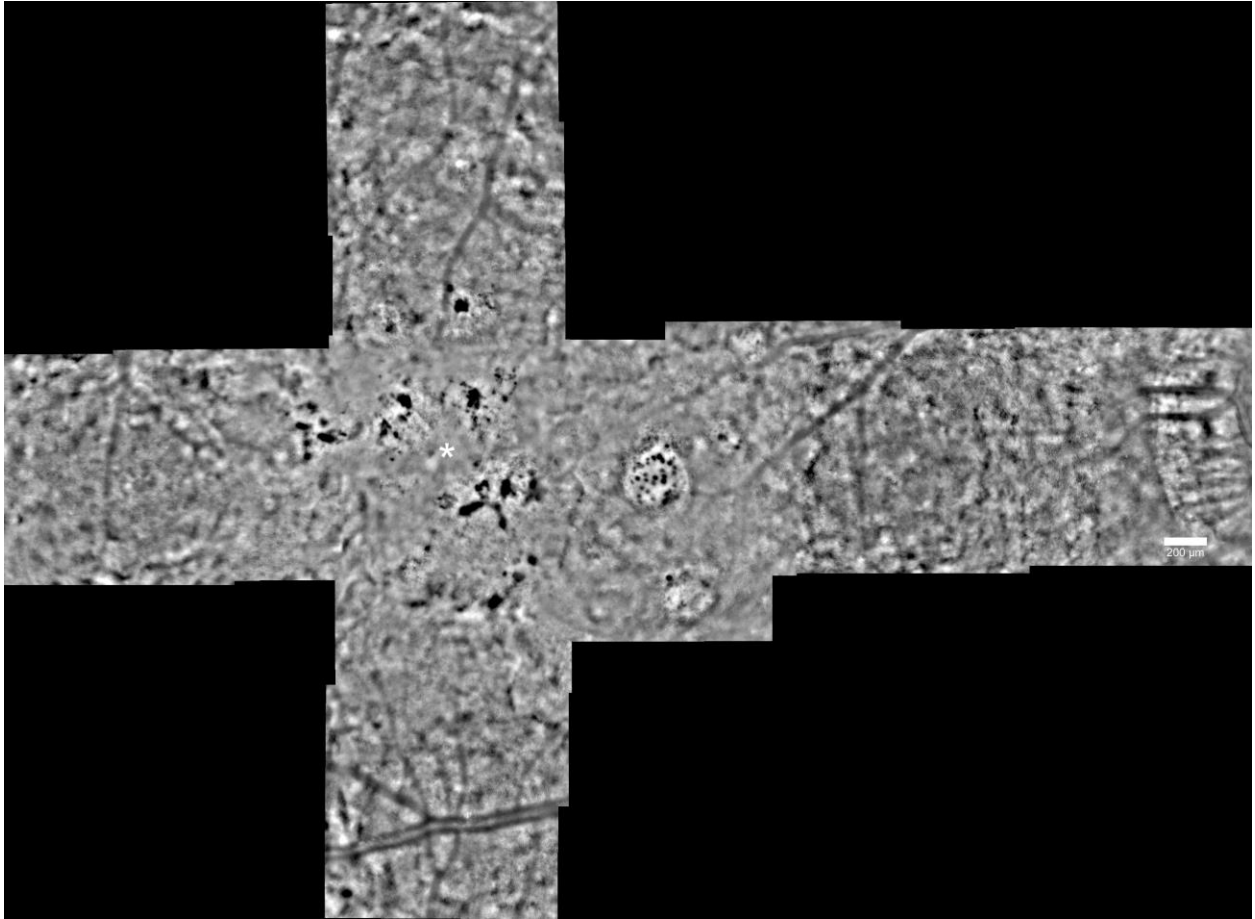

**Supplementary Figure 4:** FIAO montage from case 3.

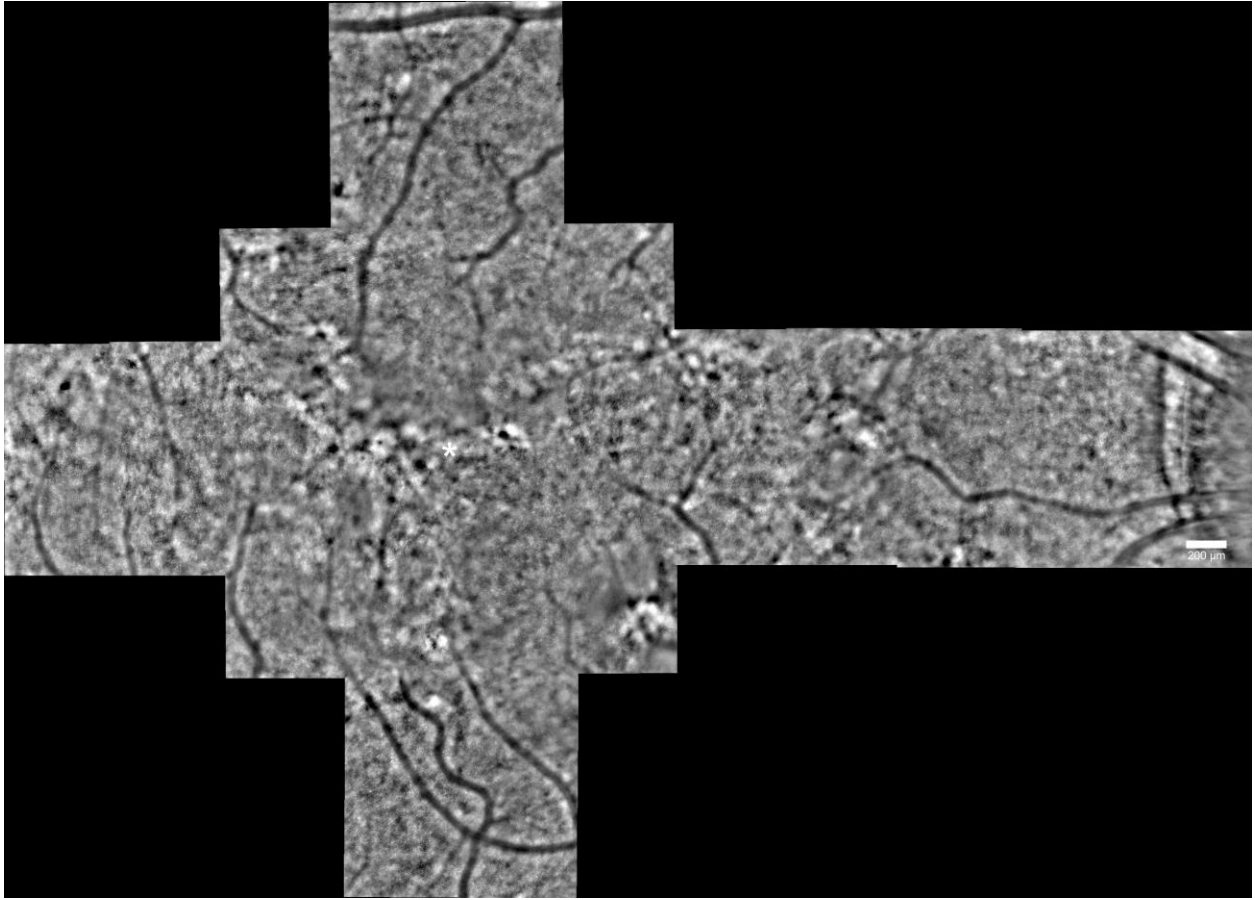

**Supplementary Figure 5:** FIAO montage from case 4.

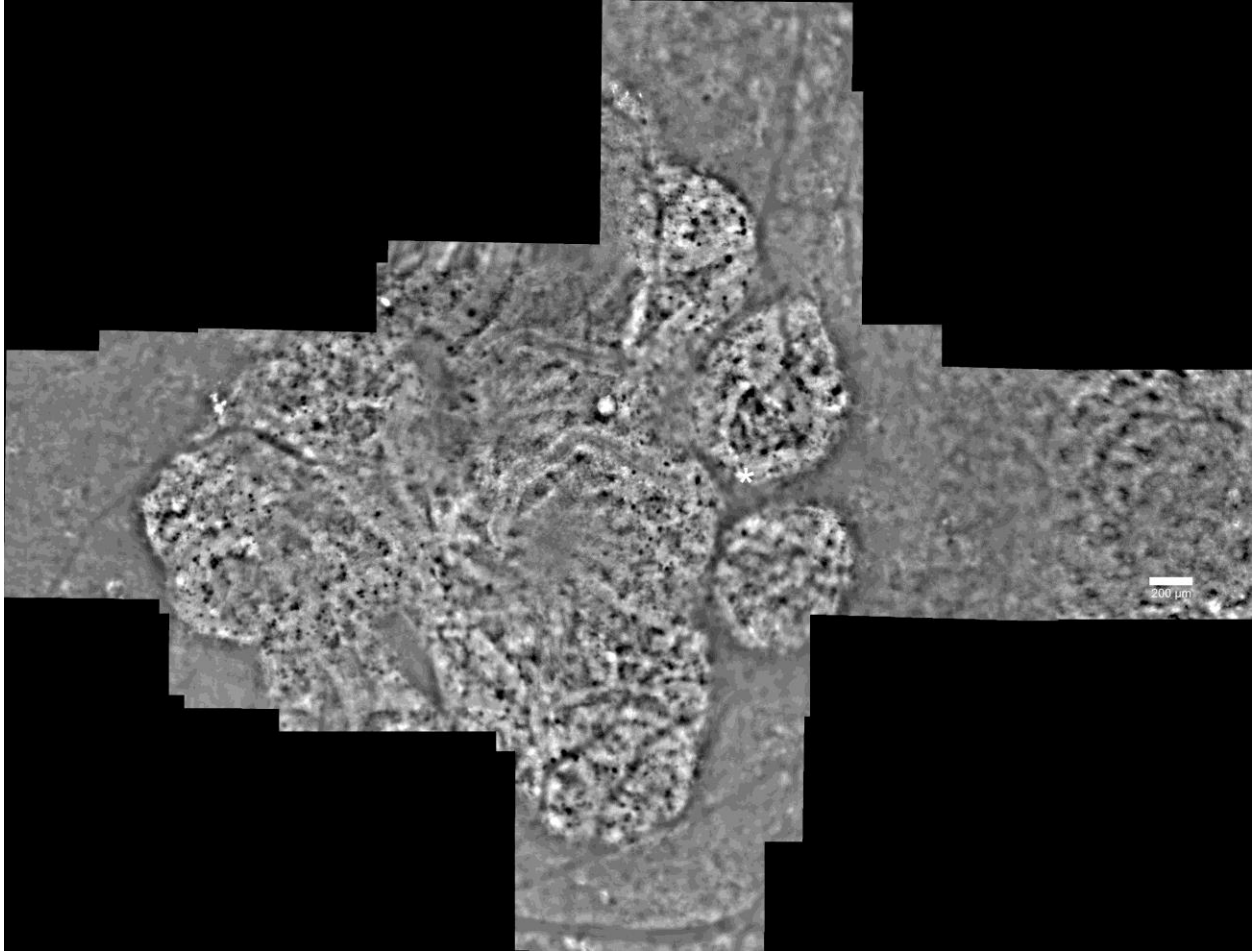

**Supplementary Figure 6:** FIAO montage from case 5.

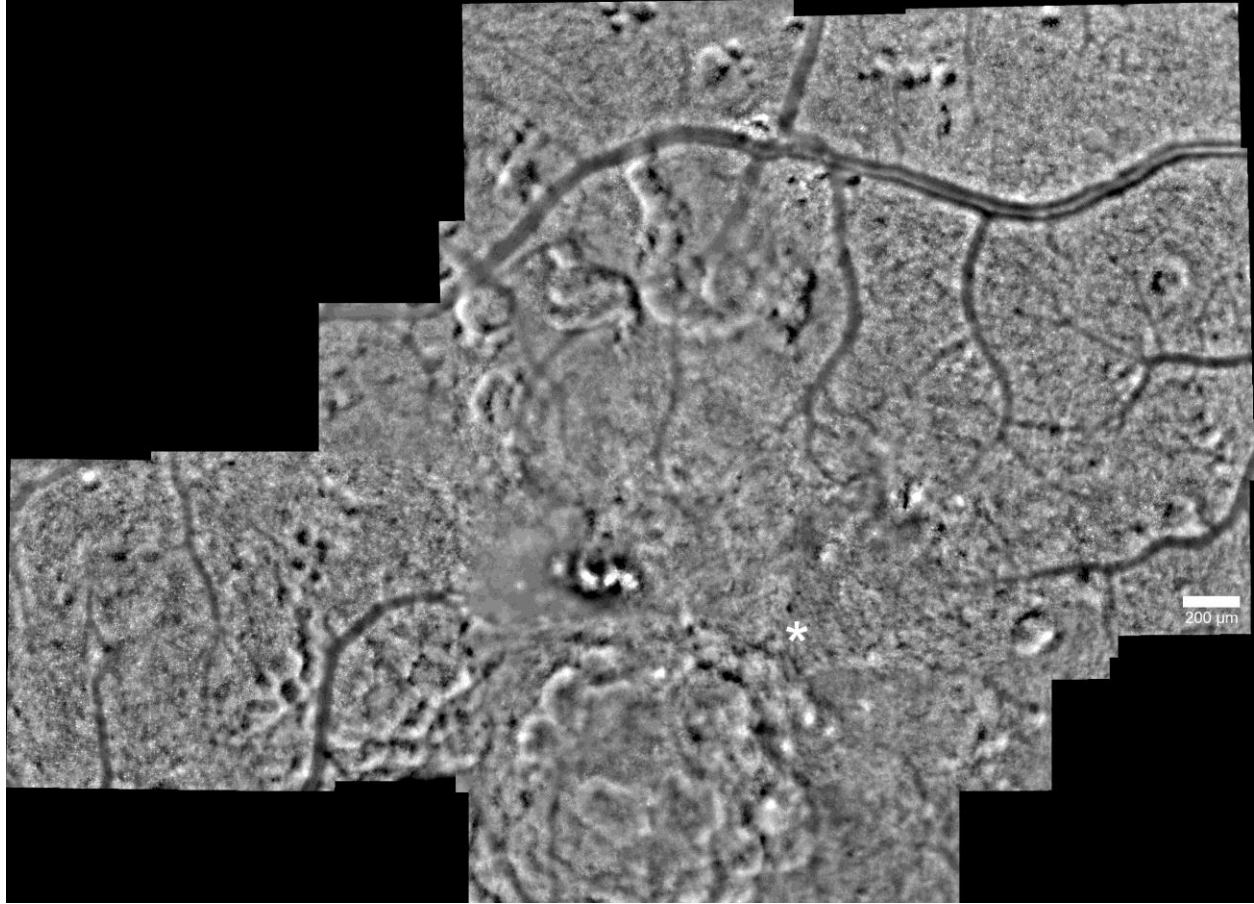

**Supplementary Figure 7:** FIAO montage from case 6.

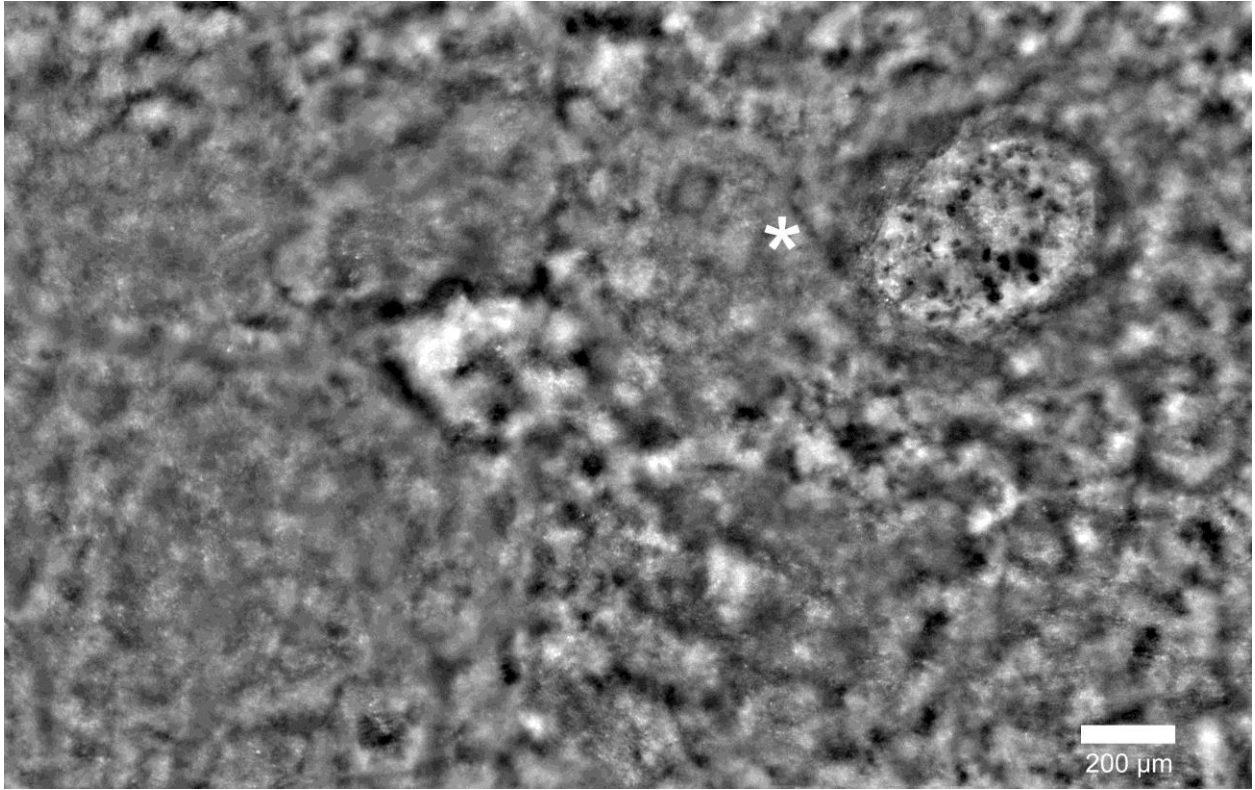

**Supplementary Figure 8:** FIAO montage from case 7.



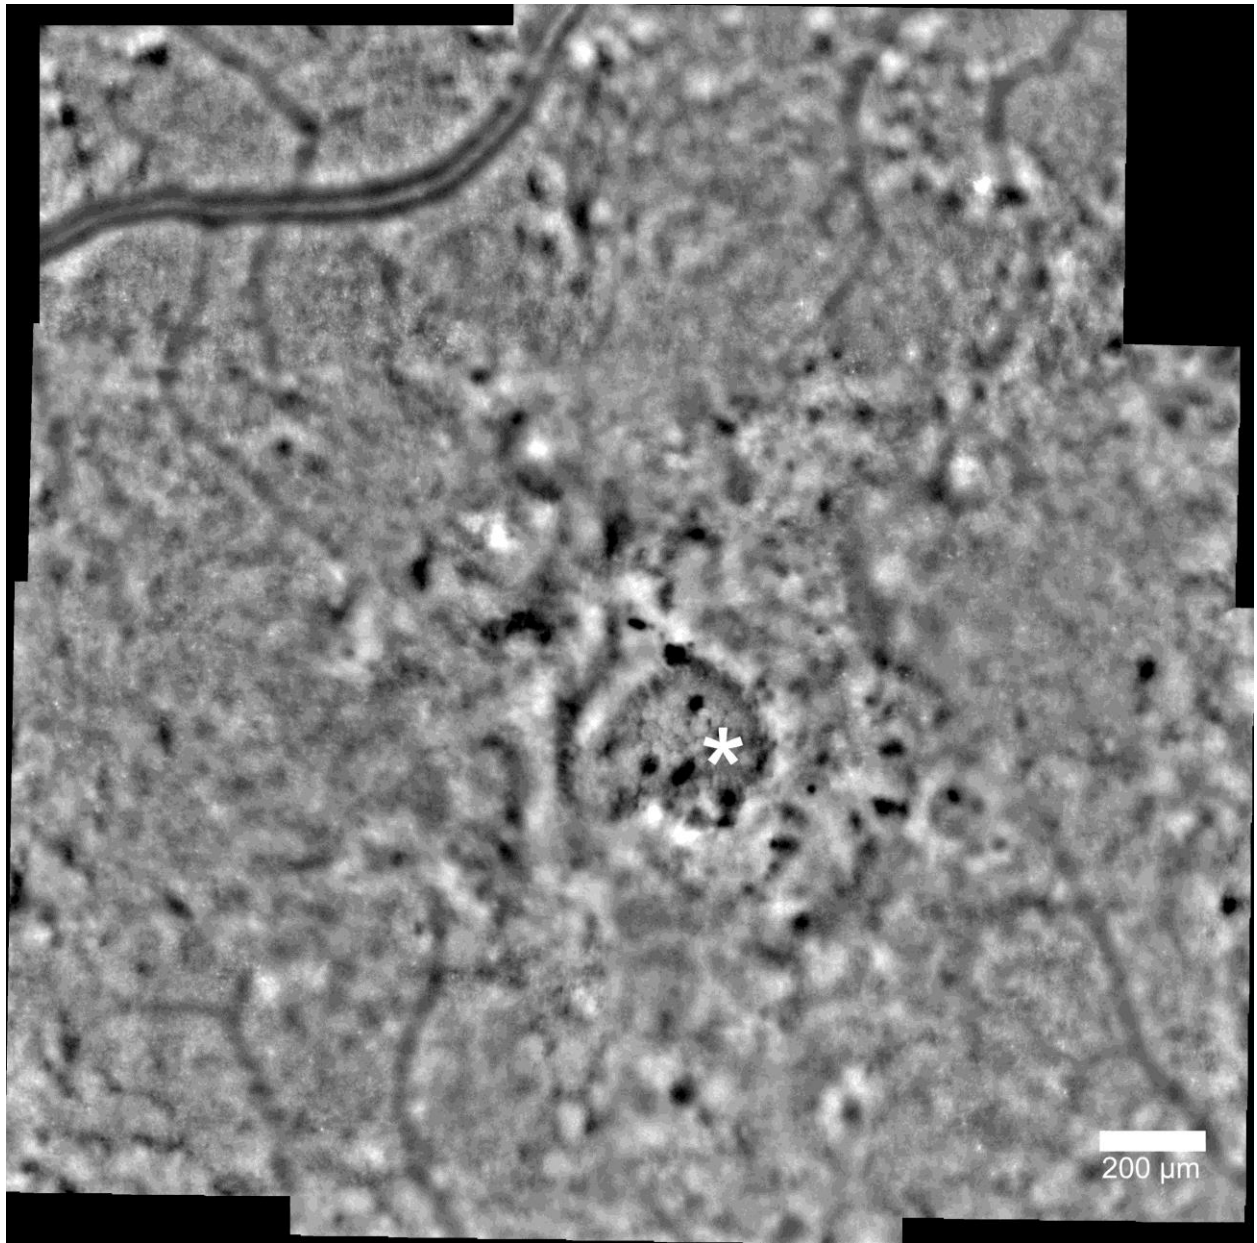

**Supplementary Figure 9:** FIAO montage from case 8.
